# Supplementary material for: Synthesis and supramolecular assembly of the bifunctional borinic acid [1,2-fcB(OH)]2
Source: Royal Society of Chemistry journal article supplement (doi:10.1039/c2dt31625k), 2012-09-10
Supplement: c2dt31625k.pdf [file c2dt31625k.pdf]

## **Electronic Supplementary Information**

### **Synthesis and Supramolecular Assembly of the Bifunctional Borinic Acid [1,2-FcB(OH)]<sub>2</sub>**

*Thilagar Pakkirisamy,<sup>a,b</sup> Didier Murillo,<sup>a</sup> Jiawei Chen,<sup>a</sup> and Frieder Jäkle<sup>a\*</sup>*

<sup>a</sup> Department of Chemistry, Rutgers University-Newark, 73 Warren Street, Newark, NJ 07102,  
USA.

<sup>b</sup> Inorganic and Physical Chemistry Department, Indian Institute of Science, Bangalore, 560 012,  
India

\* To whom correspondence should be addressed. E-mail: [fjaekle@rutgers.edu](mailto:fjaekle@rutgers.edu)

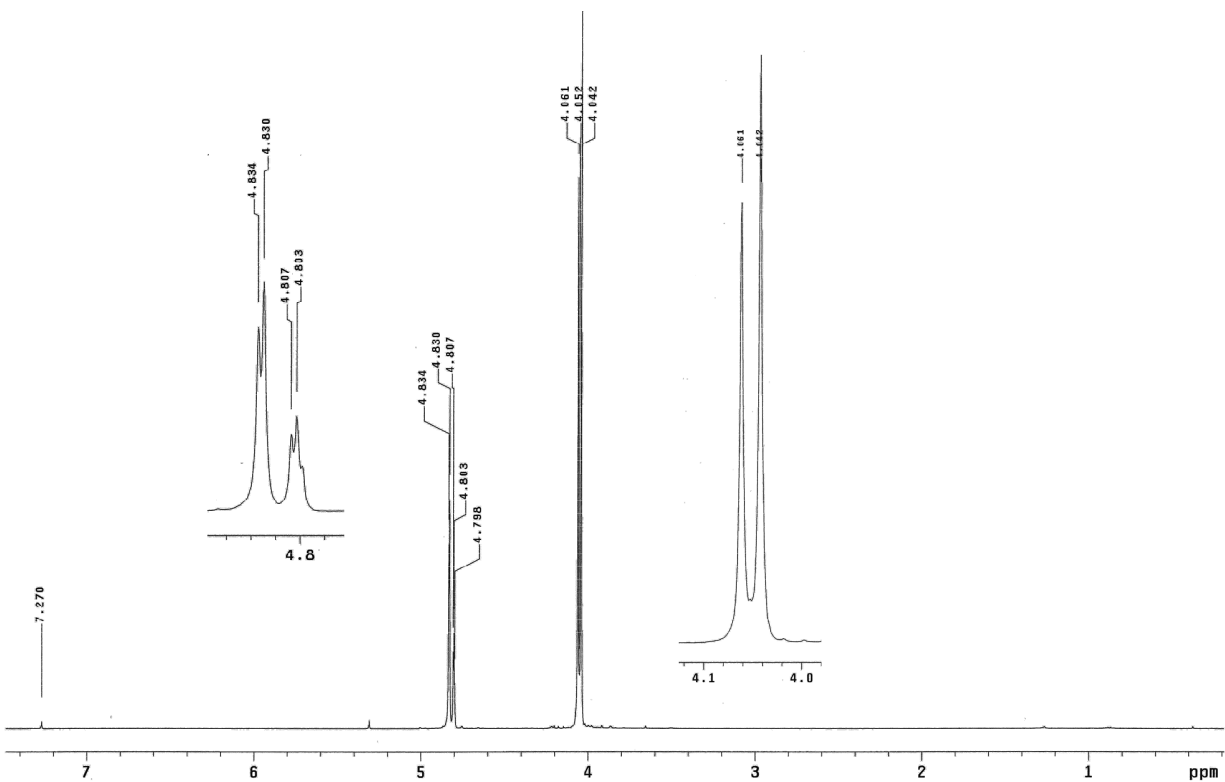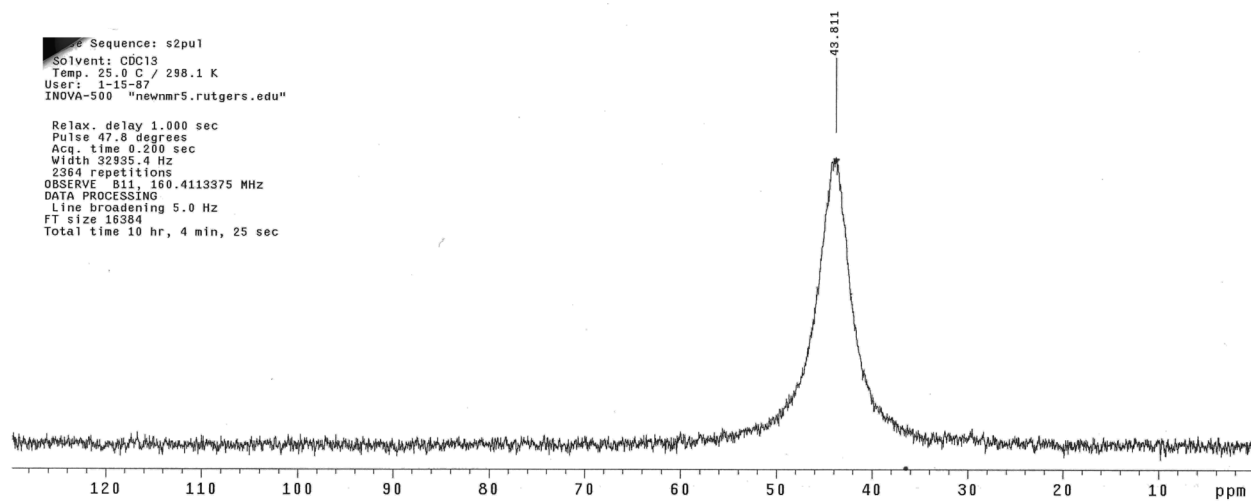

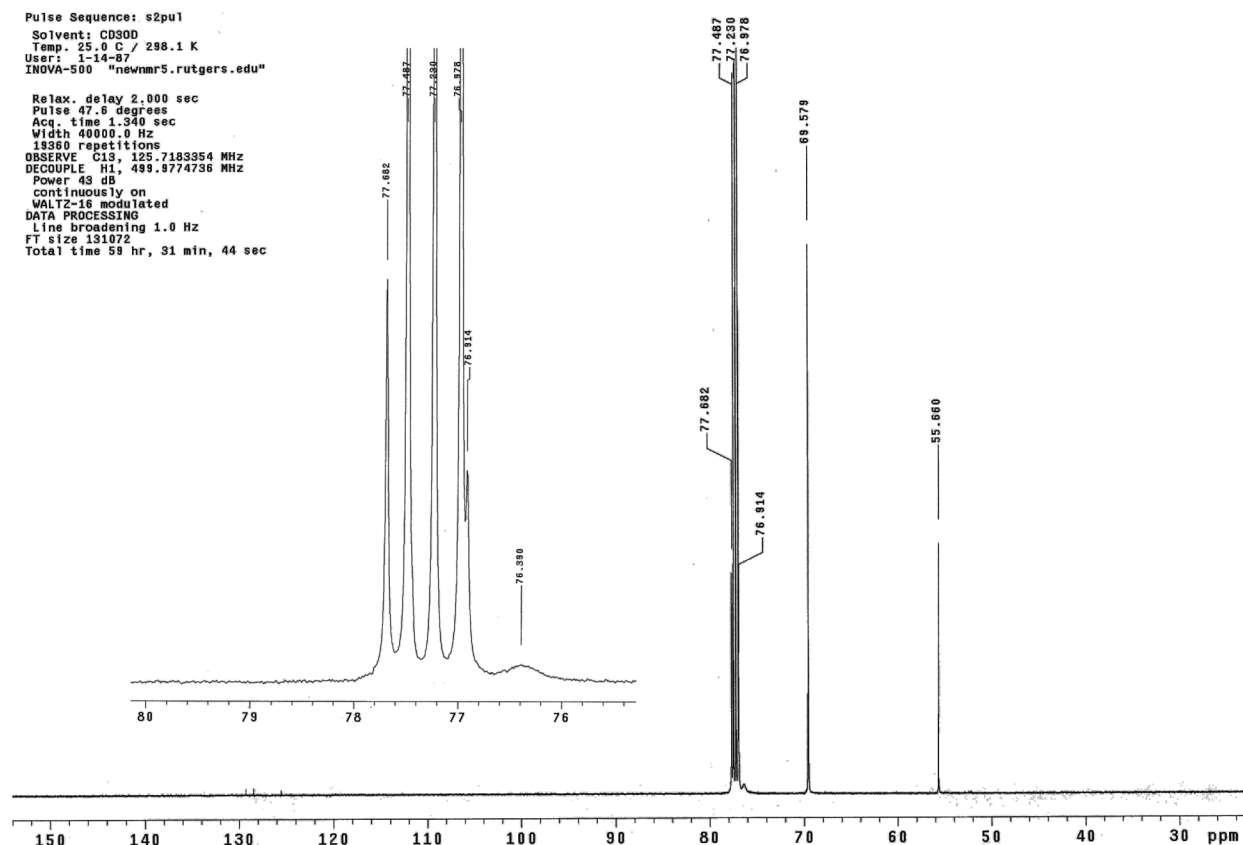

**Figure S1c.** <sup>13</sup>C NMR spectrum of **2** in CDCl<sub>3</sub> (25 °C)

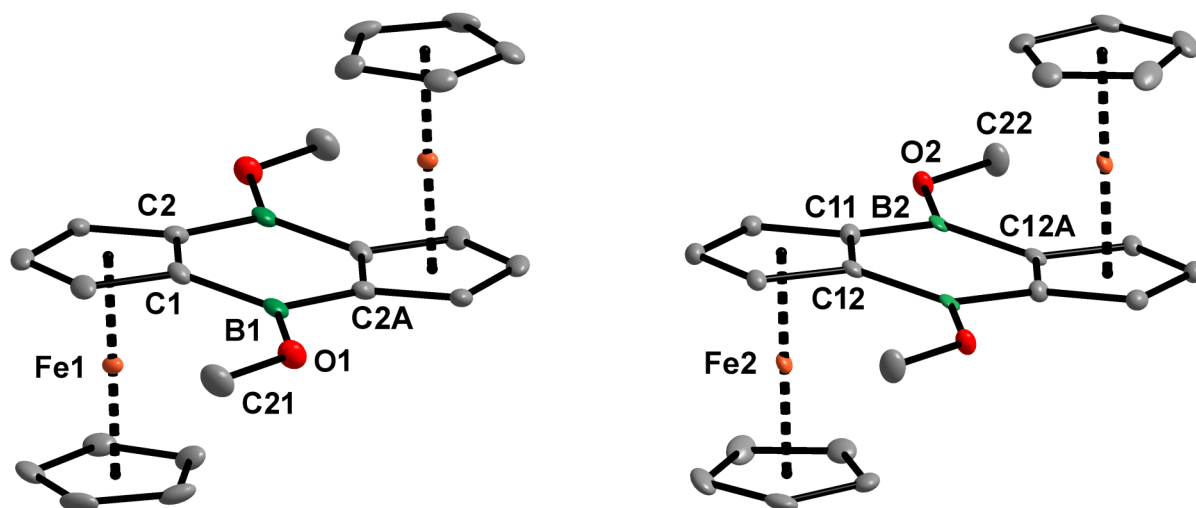

**Figure S2.** Ellipsoid representations of 2 independent molecules in the unit cell of **2**. Thermal ellipsoids drawn at 50% probability level; hydrogen atoms are omitted.

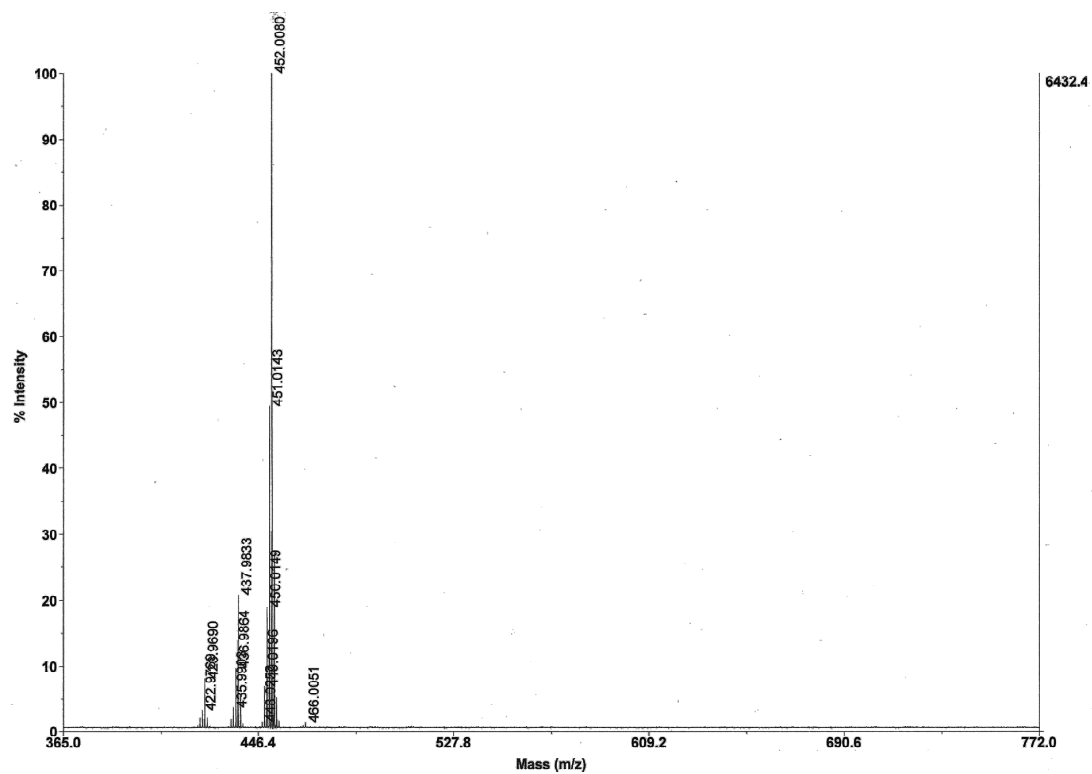

**Figure S3.** MALDI-TOF MS data of **2** (+ mode, benzo[a]pyrene matrix).

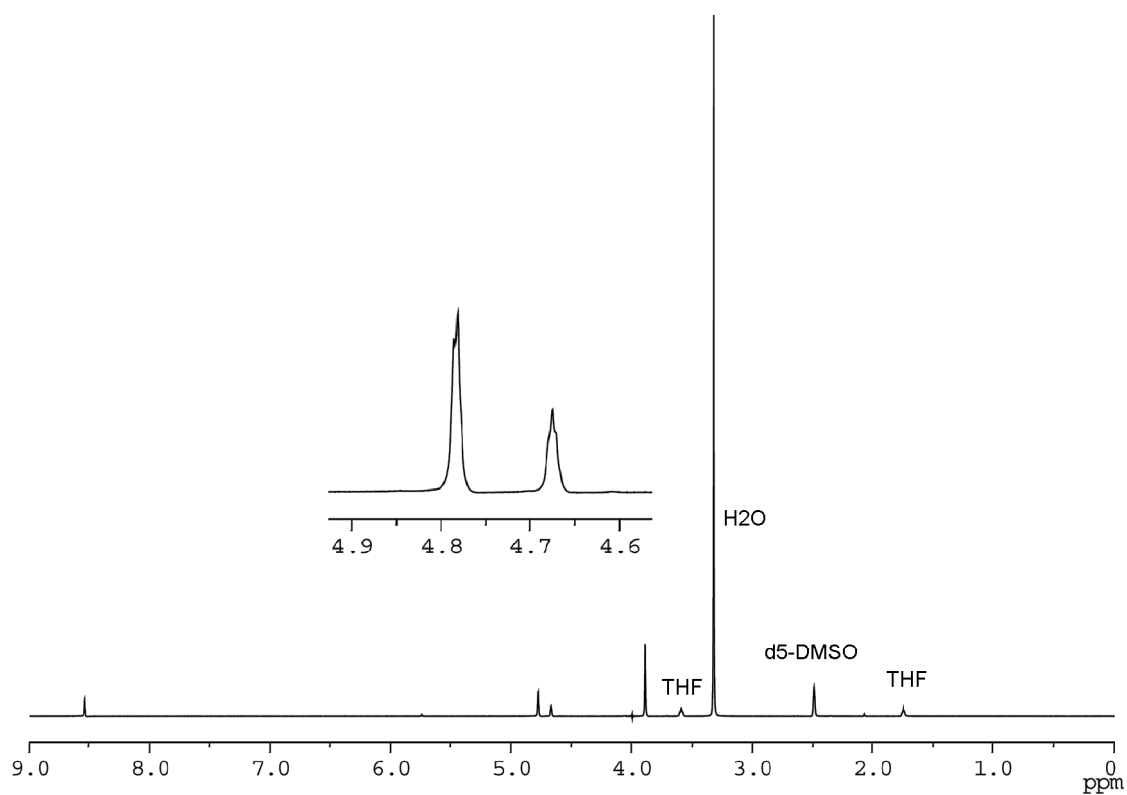

**Figure S4a.** <sup>1</sup>H spectrum of **3•THF** in d<sup>6</sup>-DMSO (25 °C).

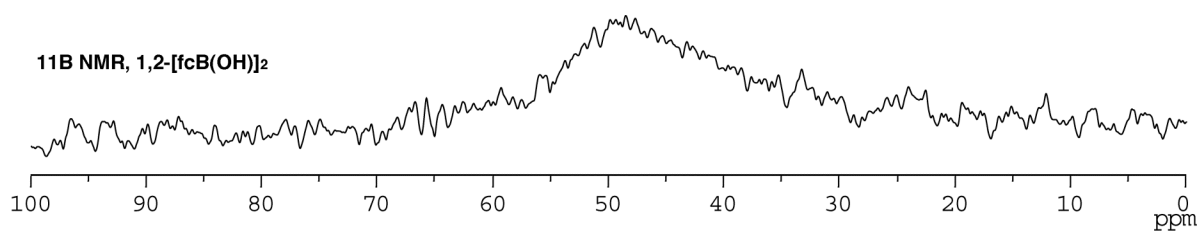

**Figure S4b.** <sup>11</sup>B NMR spectrum of **3•THF** in d<sup>6</sup>-DMSO (25 °C).

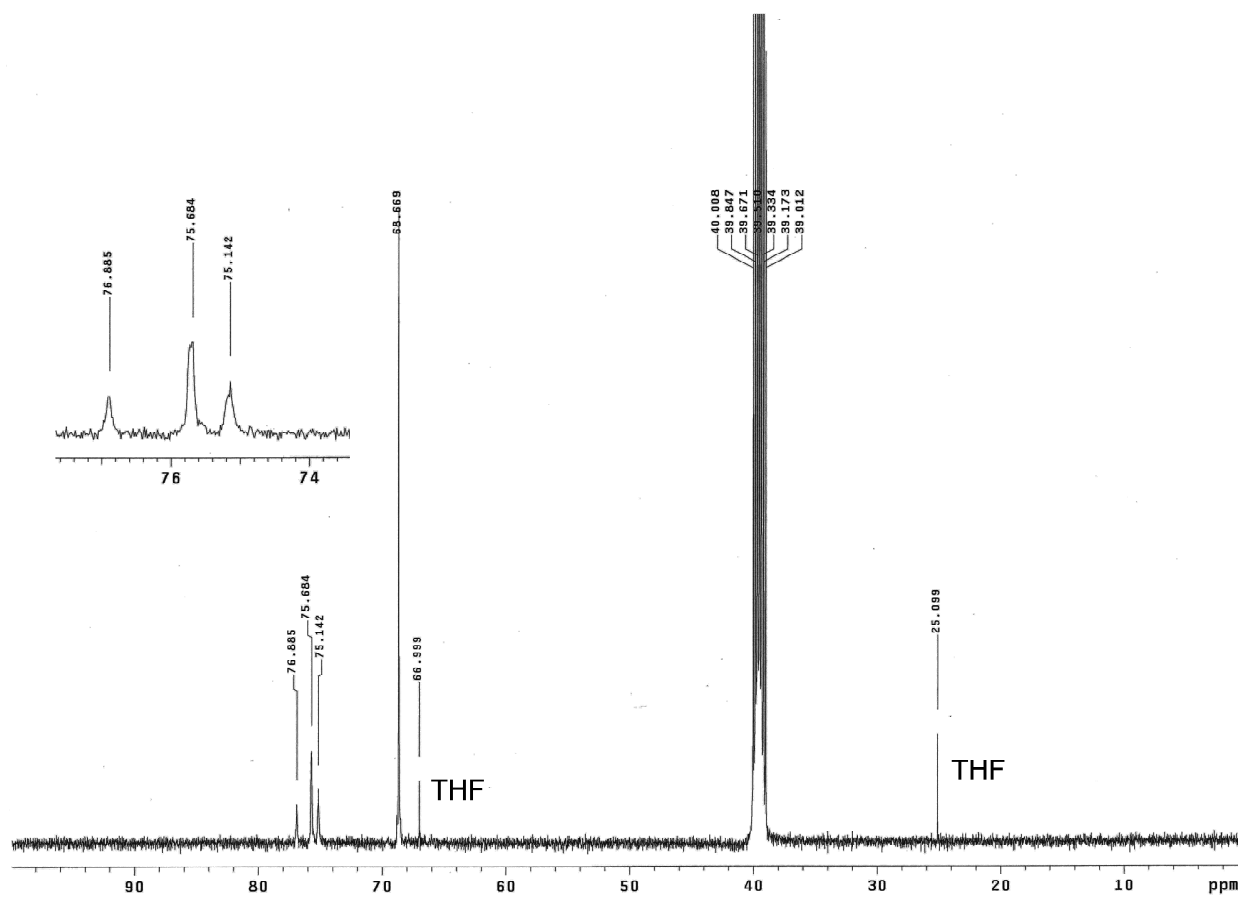

**Figure S4b.** <sup>13</sup>C NMR spectrum of **3•THF** in d<sup>6</sup>-DMSO (25 °C).

**No solvent:**

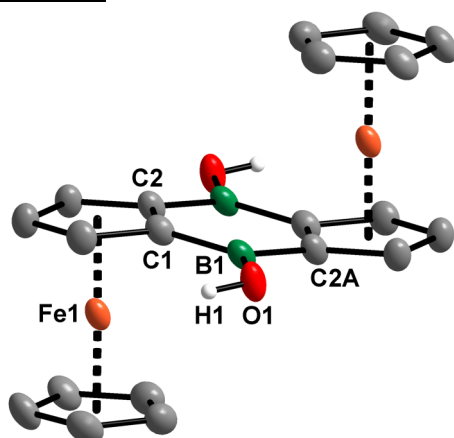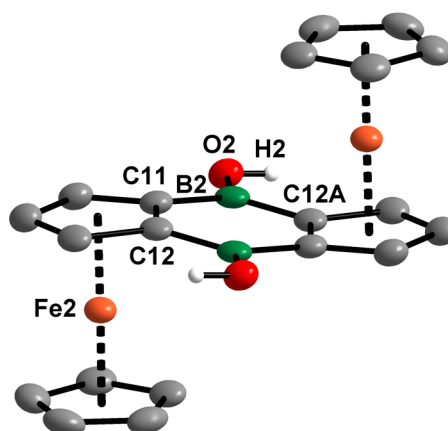

**acetone:**

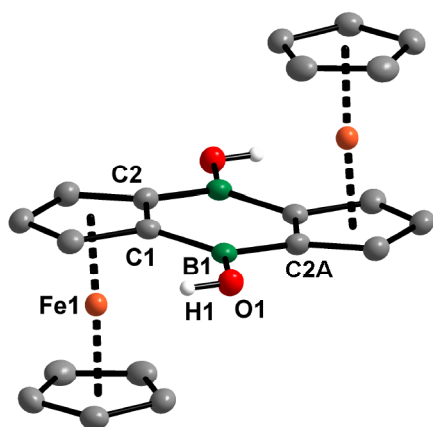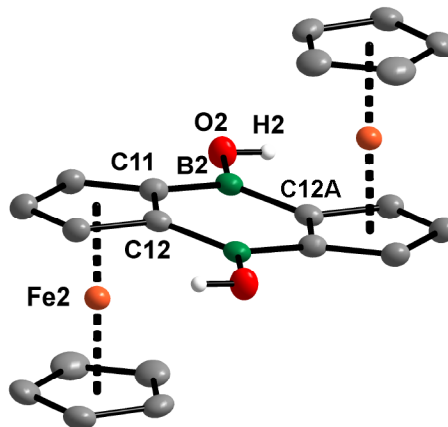

**THF:**

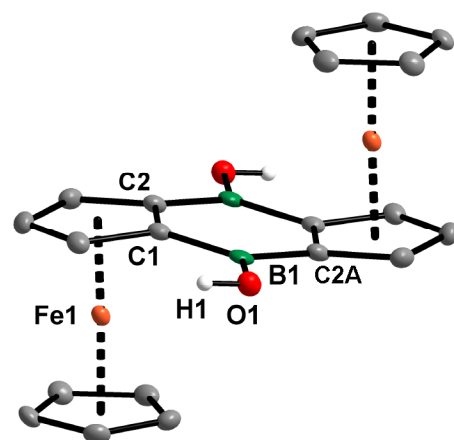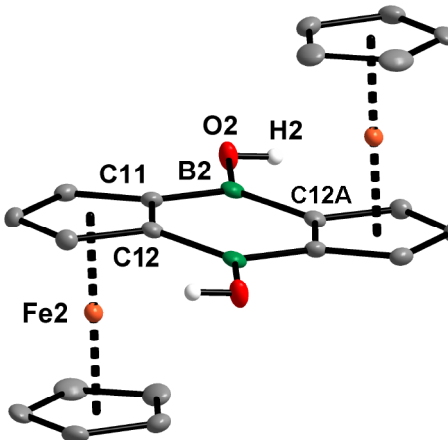

**Figure S5.** Ellipsoid representations of the main molecules in **3**, **3•acetone**, and **3•THF**. Thermal ellipsoids drawn at 50% probability level; hydrogen atoms are omitted except for the O-H hydrogens.

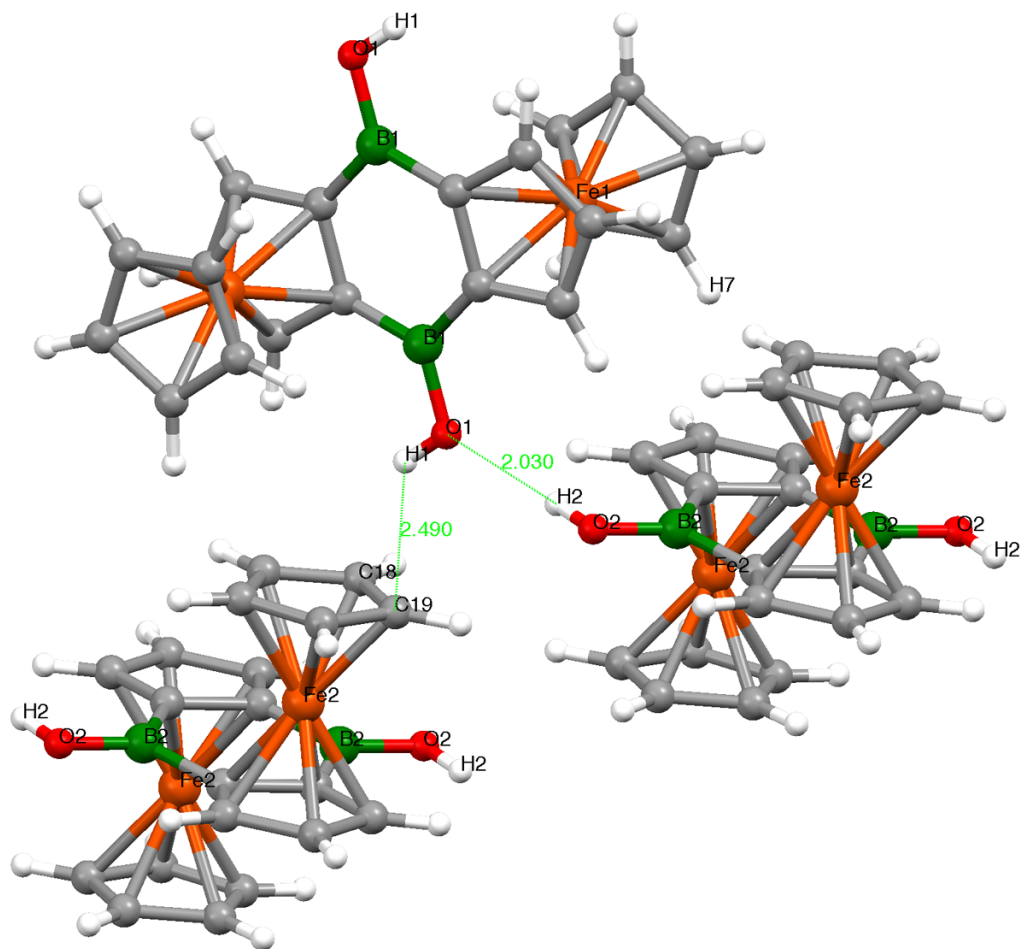

**Figure S6.** Illustration of hydrogen bonding interactions in solvent-free crystals of **3**.

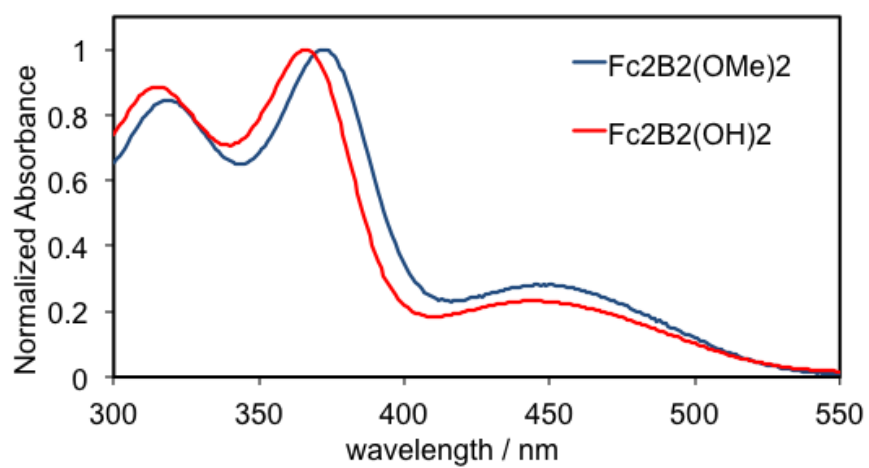

**Figure S7.** Comparison of UV-Vis spectra of **2** (CHCl<sub>3</sub>) and **3** (THF).
